# Supplementary material for: Semi-Synthesis of Small Molecules of Aminocarbazoles: Tumor Growth Inhibition and Potential Impact on p53
Source: MDPI journal article supplement (doi:10.3390/molecules26061637), 2021-03-15
Supplement: s1 [file s1]

## Supplementary information

# Semi-Synthesis of Small Molecules of Aminocarbazoles: Tumor Growth Inhibition and Potential Impact on p53

Solida Long <sup>1</sup>, Joana B. Loureiro <sup>2</sup>, Carla Carvalho <sup>2</sup>, Luís Gales <sup>3,4</sup>, Lucília Saraiva <sup>2,\*</sup>, Madalena M. M. Pinto <sup>1,5</sup>, Ploenthip Puthongking <sup>6</sup> and Emília Sousa <sup>1,5,\*</sup>

<sup>1</sup> Laboratory of Organic and Pharmaceutical Chemistry (LQOF), Department of Chemical Sciences, Faculty of Pharmacy, University of Porto, Rua de Jorge Viterbo Ferreira, 228, 4050-313 Porto, Portugal; solidachhann@gmail.com (S.L.); madalena@ff.up.pt (M.M.M.P.)

<sup>2</sup> Laboratory of Microbiology (LAQV/REQUIMTE), Department of Biological Sciences, Faculty of Pharmacy, University of Porto, Rua de Jorge Viterbo Ferreira, 228, 4050-313 Porto, Portugal; up201407524@ff.up.pt (J.B.L.); pg32852@alunos.uminho.pt (C.C.)

<sup>3</sup> Institute for the Biomedical Science Abel Salazar (ICBAS), University of Porto, Rua de Jorge Viterbo Ferreira, 228, 4050-313 Porto, Portugal; lgales@ibmc.up.pt

<sup>4</sup> Instituto de Biologia Molecular e Celular (i3S-IBMC), University of Porto, Rua de Jorge Viterbo Ferreira, 228, 4050-313 Porto, Portugal

<sup>5</sup> Interdisciplinary Centre of Marine and Environmental Research (CIIMAR), 4450-208 Matosinhos, Portugal

<sup>6</sup> Department of Pharmaceutical Chemistry, Faculty of Pharmaceutical Sciences, Khon Kean University, Khon Kean, 40002, Thailand; pploenthip@kku.ac.th

\* Correspondences: luciliasaraiva@ff.up.pt (L.S.); esousa@ff.up.pt (E.S.); Tel.: +351-2-2042-8689 (E.S.)

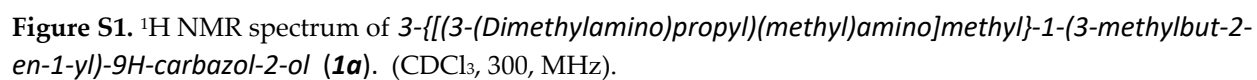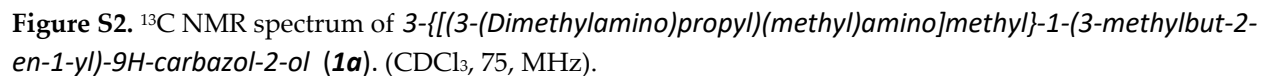



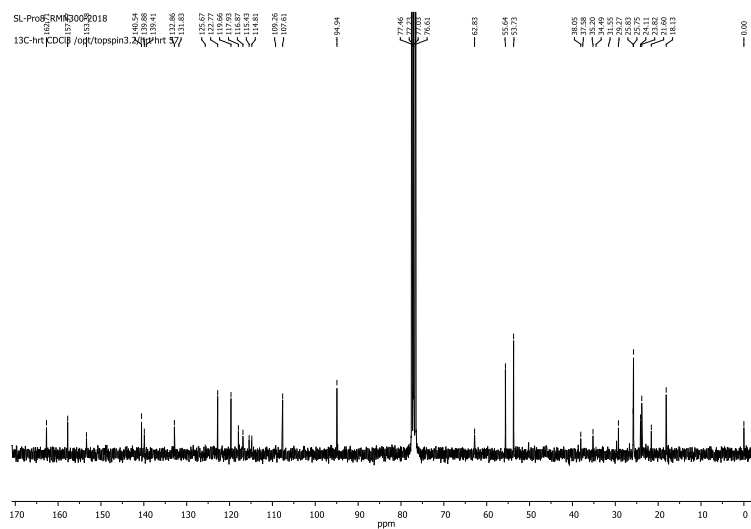

**Figure S5.**  $^{13}\text{C}$  NMR spectrum of 1-(3-Methylbut-2-en-1-yl)-3-(piperidin-1-ylmethyl)-9H-carbazol-2-ol (**1b**) ( $\text{CDCl}_3$ , 75, MHz).

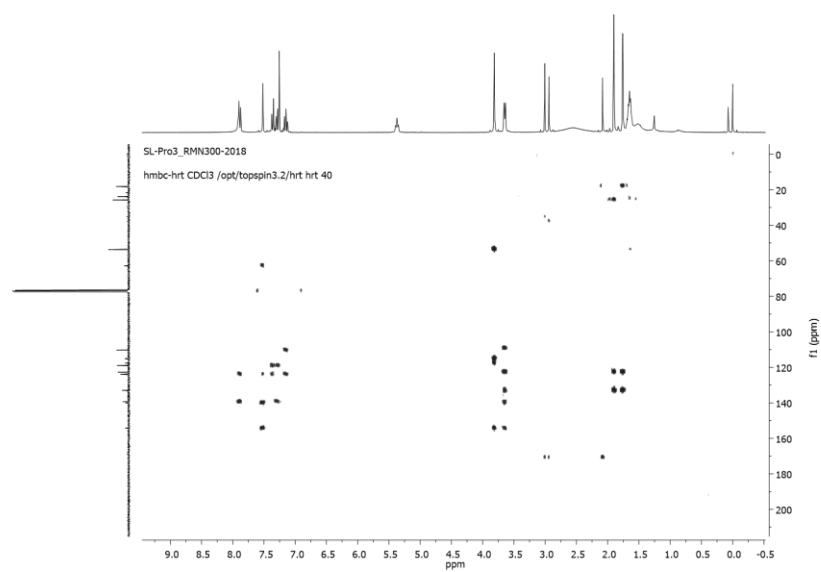

**Figure S6.** HMBC spectrum of 1-(3-Methylbut-2-en-1-yl)-3-(piperidin-1-ylmethyl)-9H-carbazol-2-ol (**1b**) ( $\text{CDCl}_3$ , 300 MHz).



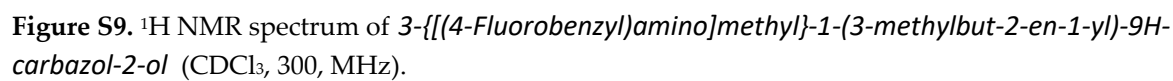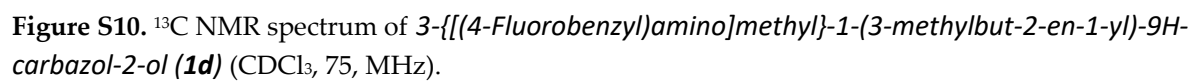







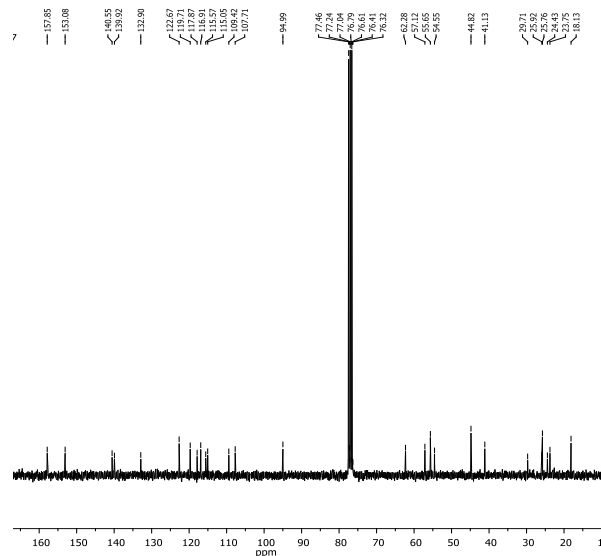

**Figure S15:**  $^{13}\text{C}$  NMR spectrum of 3-[[[3-(Dimethylamino)propyl](methyl)amino]methyl]-7-methoxy-1-(3-methylbut-2-en-1-yl)-9H-carbazol-2-ol (**2a**) ( $\text{CDCl}_3$ , 75, MHz).

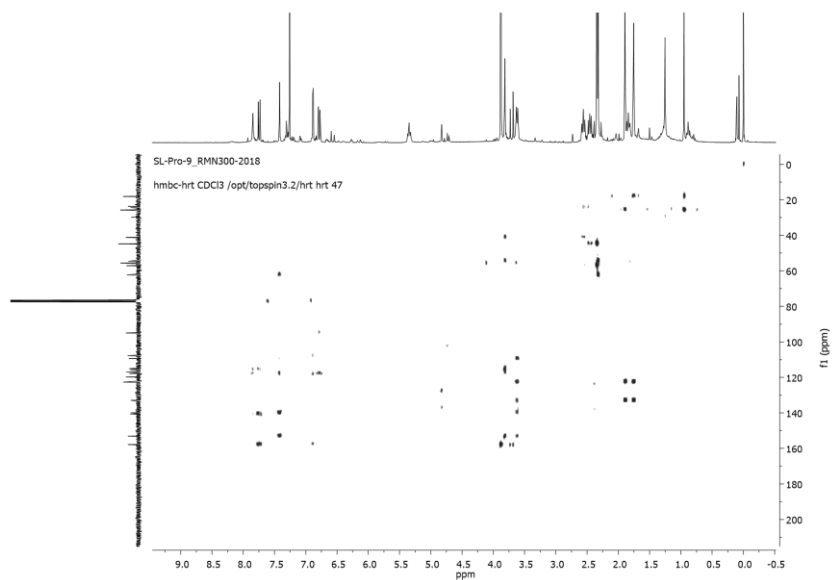

**Figure S16:** HRMS spectrum of 3-[[[3-(Dimethylamino)propyl](methyl)amino]methyl]-7-methoxy-1-(3-methylbut-2-en-1-yl)-9H-carbazol-2-ol (**2a**) ( $\text{CDCl}_3$ , 300, MHz).

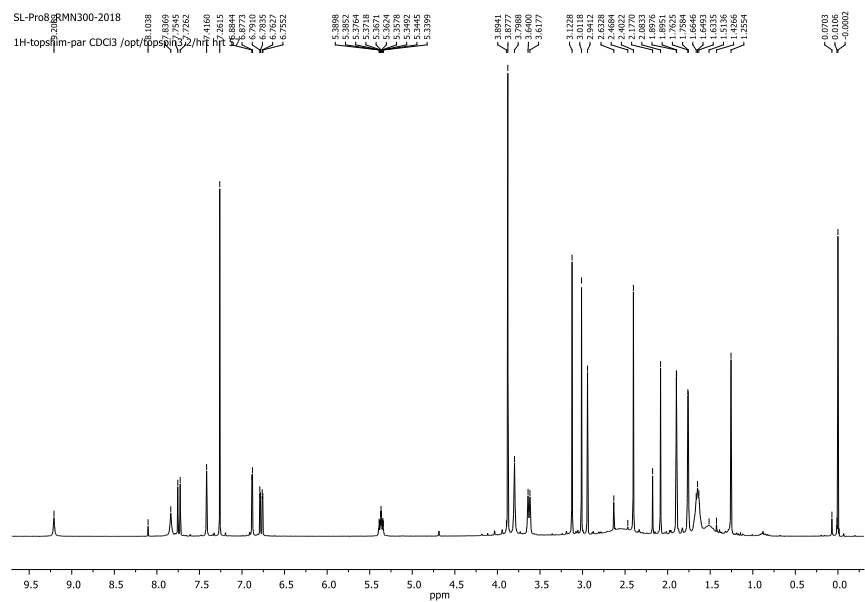

**Figure S17:**  $^1\text{H}$  NMR spectrum of 7-Methoxy-1-(3-methylbut-2-en-1-yl)-3-(piperidin-1-ylmethyl)-9H-carbazol-2-ol (**2b**). ( $\text{CDCl}_3$ , 300, MHz).

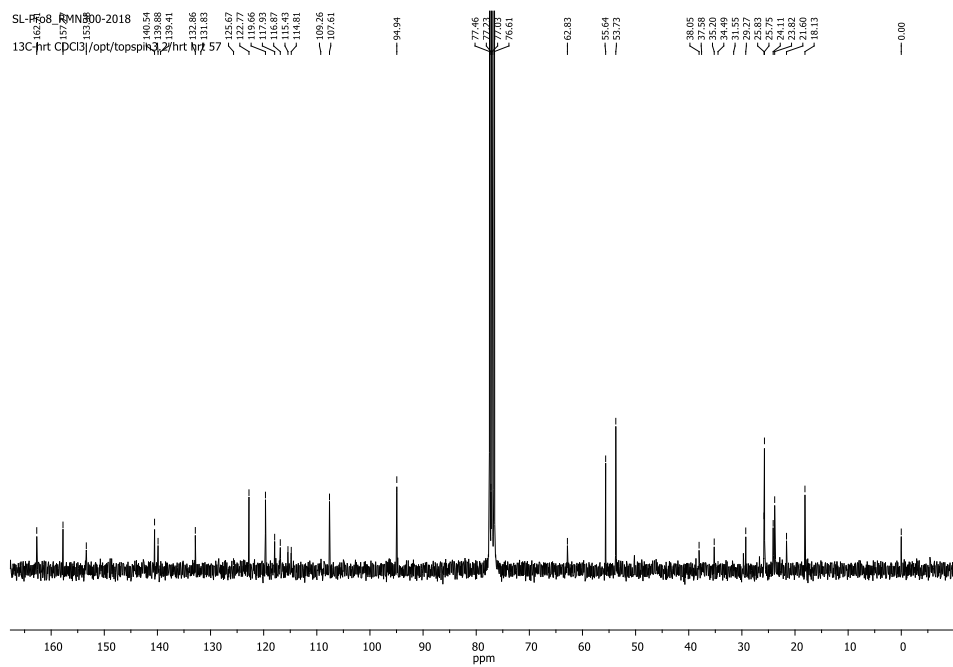

**Figure S18:**  $^{13}\text{C}$  NMR spectrum of 7-Methoxy-1-(3-methylbut-2-en-1-yl)-3-(piperidin-1-ylmethyl)-9H-carbazol-2-ol (**2b**). ( $\text{CDCl}_3$ , 75, MHz).

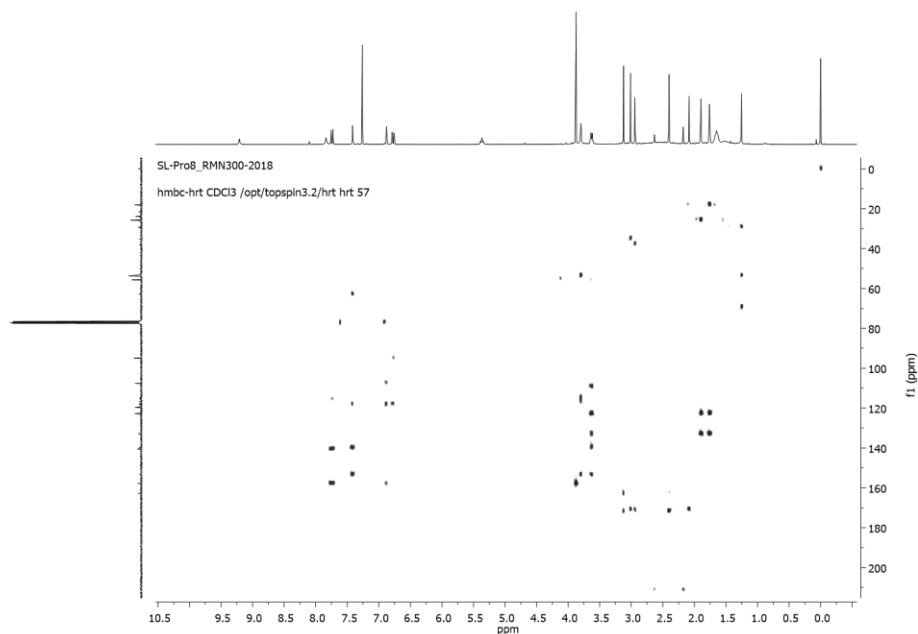

**Figure S19:** HMBC spectrum of 7-Methoxy-1-(3-methylbut-2-en-1-yl)-3-(piperidin-1-ylmethyl)-9H-carbazol-2-ol (**2b**). (CDCl<sub>3</sub>, 300, MHz).

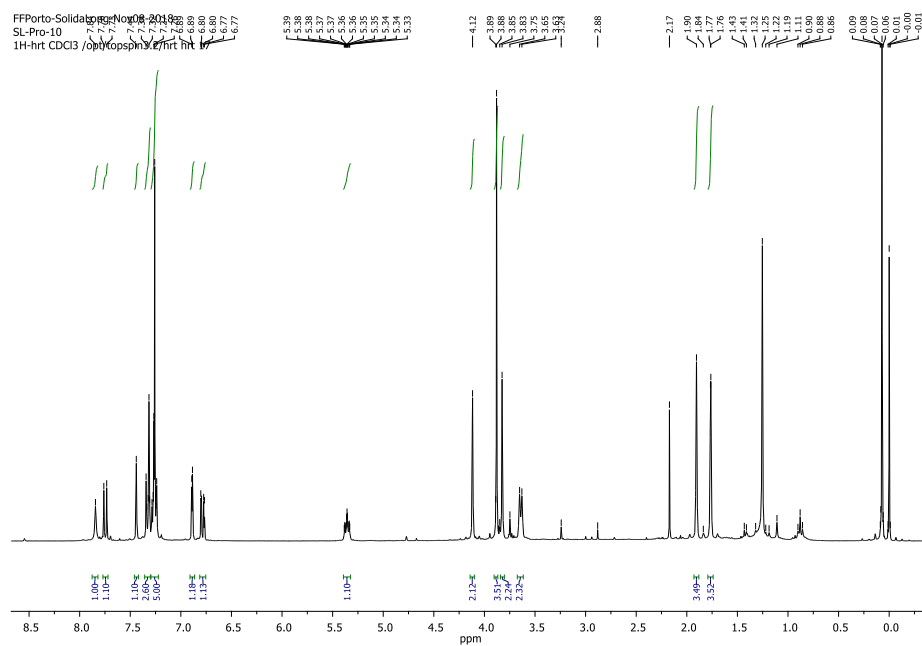

**Figure S20:** <sup>1</sup>H NMR spectrum of 3-[(4-Chlorobenzyl)amino]methyl}-7-methoxy-1-(3-methylbut-2-en-1-yl)-9H-carbazol-2-ol (**2c**). (CDCl<sub>3</sub>, 300, MHz).

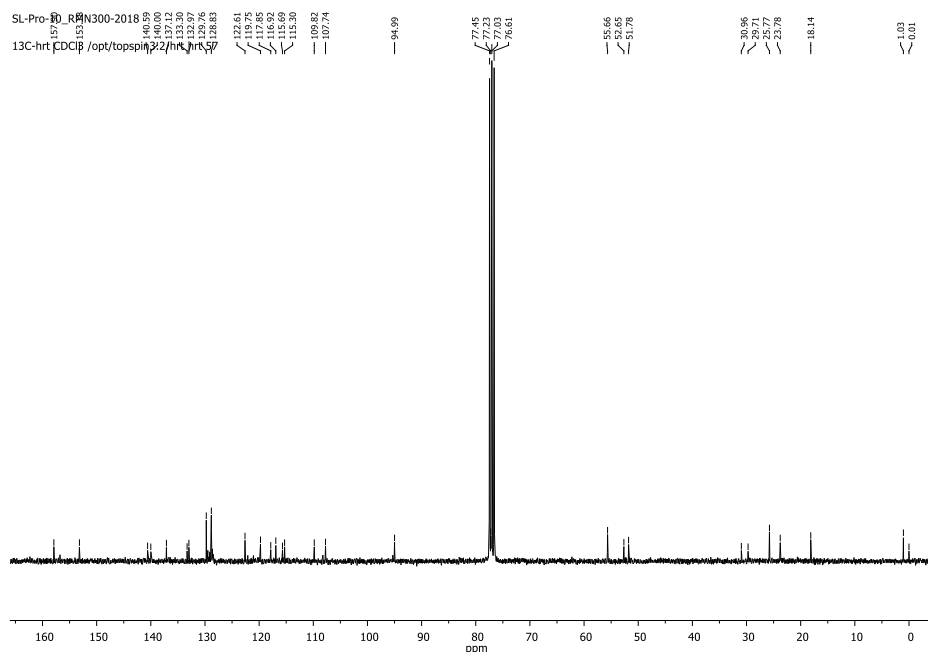

**Figure S21:**  $^{13}\text{C}$  NMR spectrum of 3-[[[4-Chlorobenzyl)amino]methyl]-7-methoxy-1-(3-methylbut-2-en-1-yl)-9H-carbazol-2-ol (**2c**) ( $\text{CDCl}_3$ , 75, MHz).

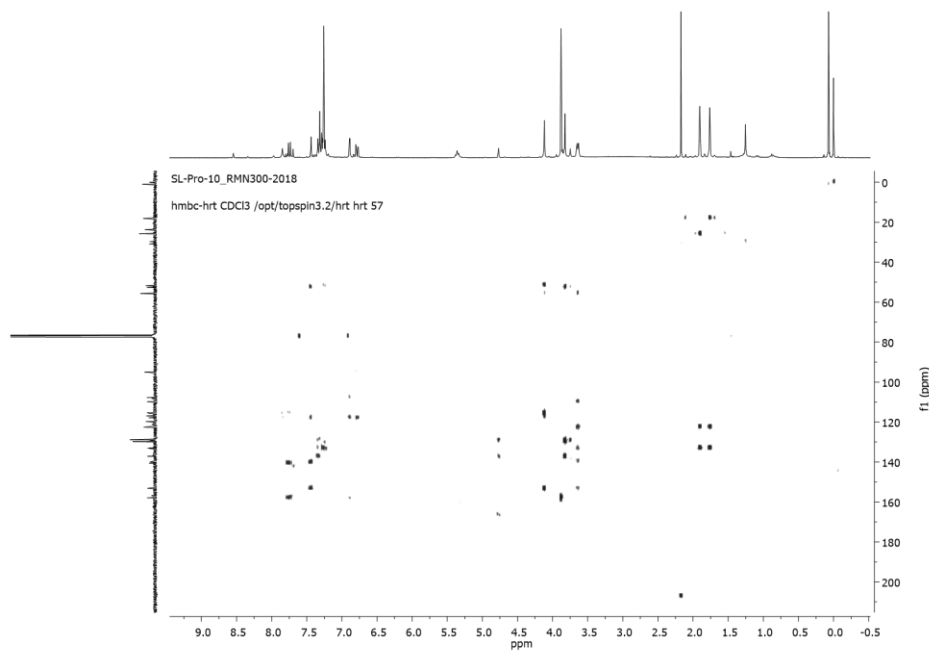

**Figure S22:** HMBC spectrum of 3-[[[4-Chlorobenzyl)amino]methyl]-7-methoxy-1-(3-methylbut-2-en-1-yl)-9H-carbazol-2-ol (**2c**) ( $\text{CDCl}_3$ , 300, MHz).



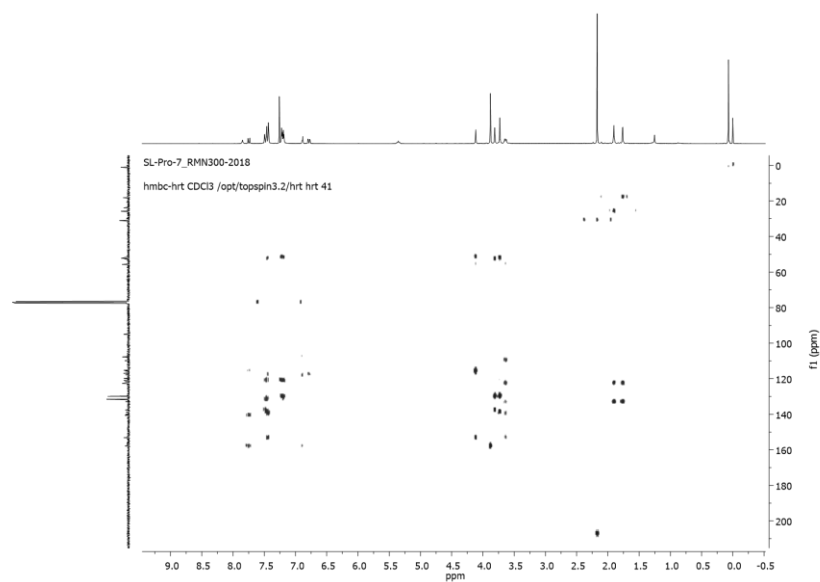

**Figure S25:** HMBC spectrum of 3-[[*(4-Fluorobenzyl)amino*]methyl]-7-methoxy-1-(3-methylbut-2-en-1-yl)-9*H*-carbazol-2-ol (**2d**) (CDCl<sub>3</sub>, 300, MHz).

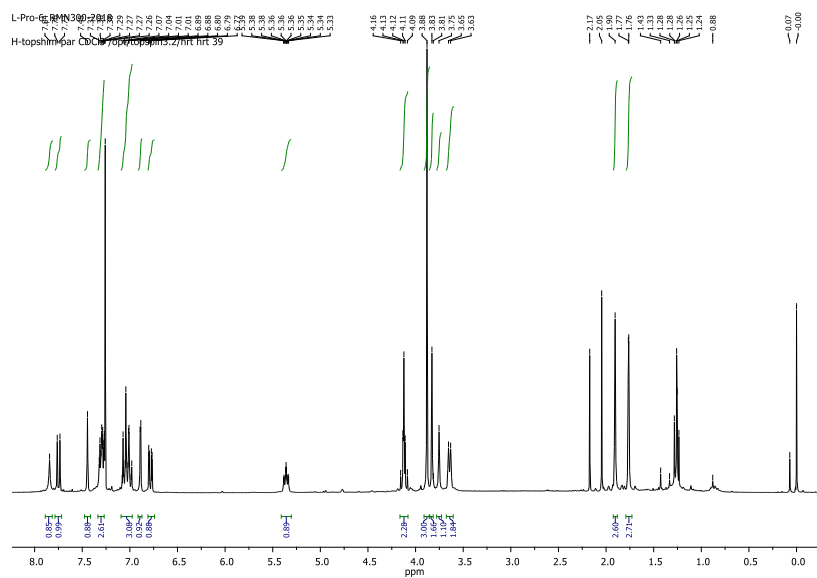

**Figure S26:** <sup>1</sup>H NMR spectrum 3-[[*(4-Bromobenzyl)amino*]methyl]-7-methoxy-1-(3-methylbut-2-en-1-yl)-9*H*-carbazol-2-ol (**2e**) (CDCl<sub>3</sub>, 300, MHz).

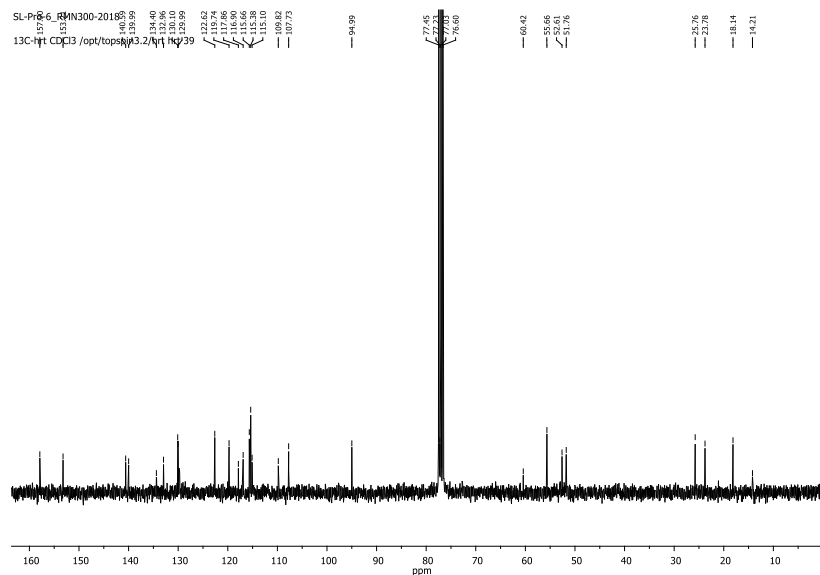

**Figure S27:**  $^{13}\text{C}$  NMR spectrum of 3-[[*(4-Bromobenzyl)amino*]methyl]-7-methoxy-1-(3-methylbut-2-en-1-yl)-9*H*-carbazol-2-ol (**2e**) ( $\text{CDCl}_3$ , 75, MHz).

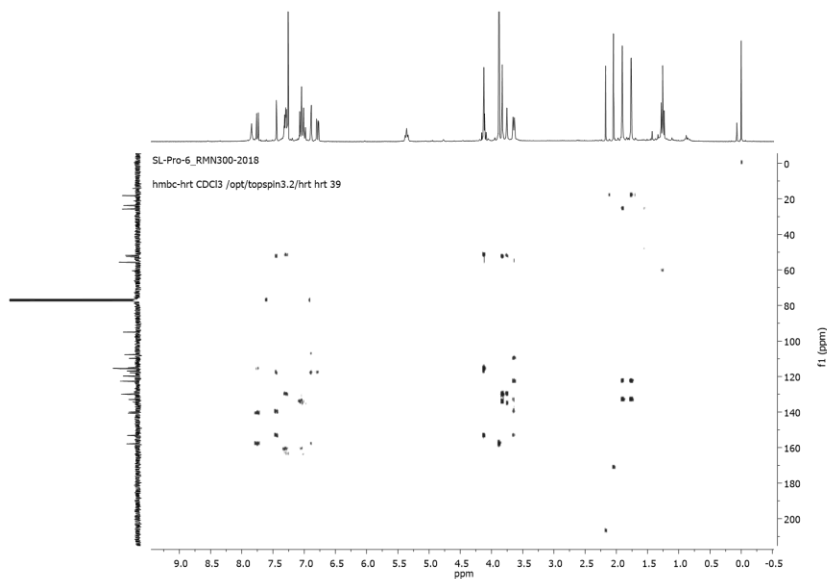

**Figure S28:**  $^{13}\text{C}$  NMR spectrum of 3-[[*(4-Bromobenzyl)amino*]methyl]-7-methoxy-1-(3-methylbut-2-en-1-yl)-9*H*-carbazol-2-ol (**2e**) ( $\text{CDCl}_3$ , 300, MHz).

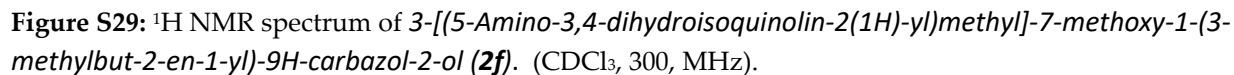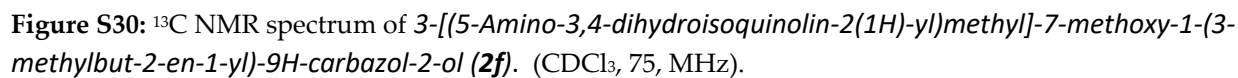





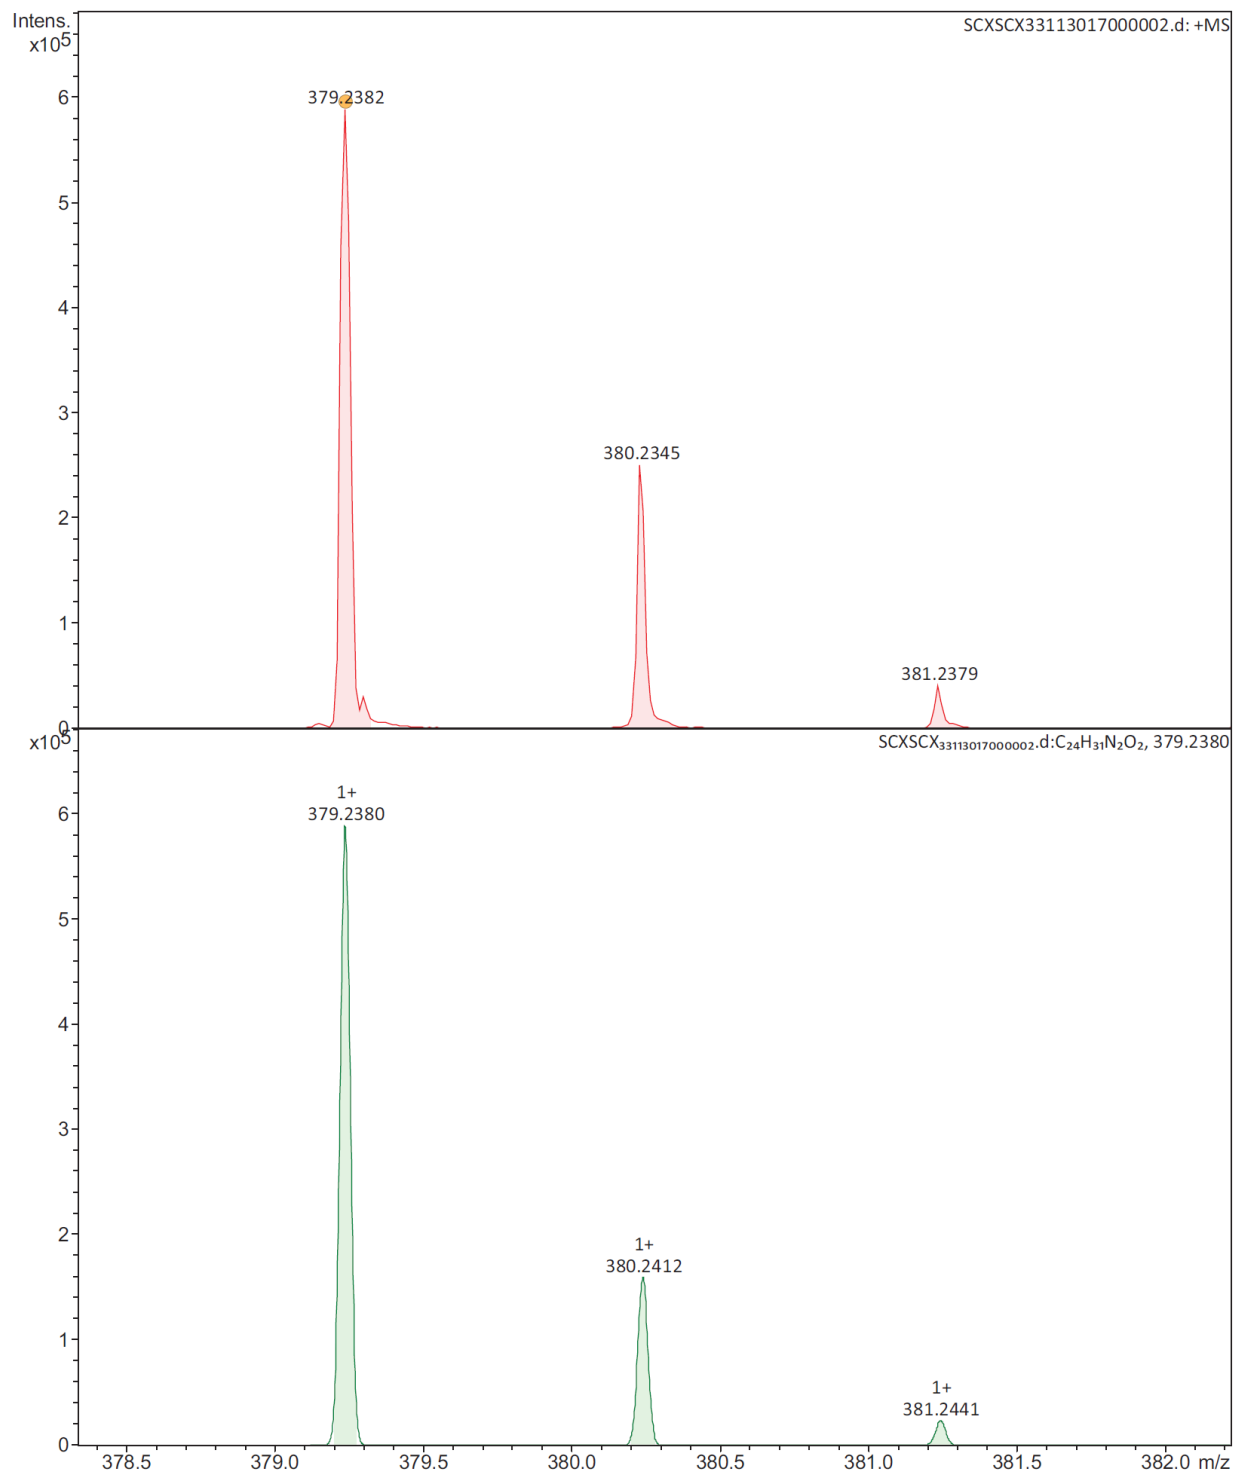

**Figure S33:** HRMS of compound 3- $\{[(3-(\text{Dimethylamino})\text{propyl})(\text{methyl})\text{amino}]\text{methyl}\}$ -1-(3-methylbut-2-en-1-yl)-9H-carbazol-2-ol (**1a**), (20, 300 V).

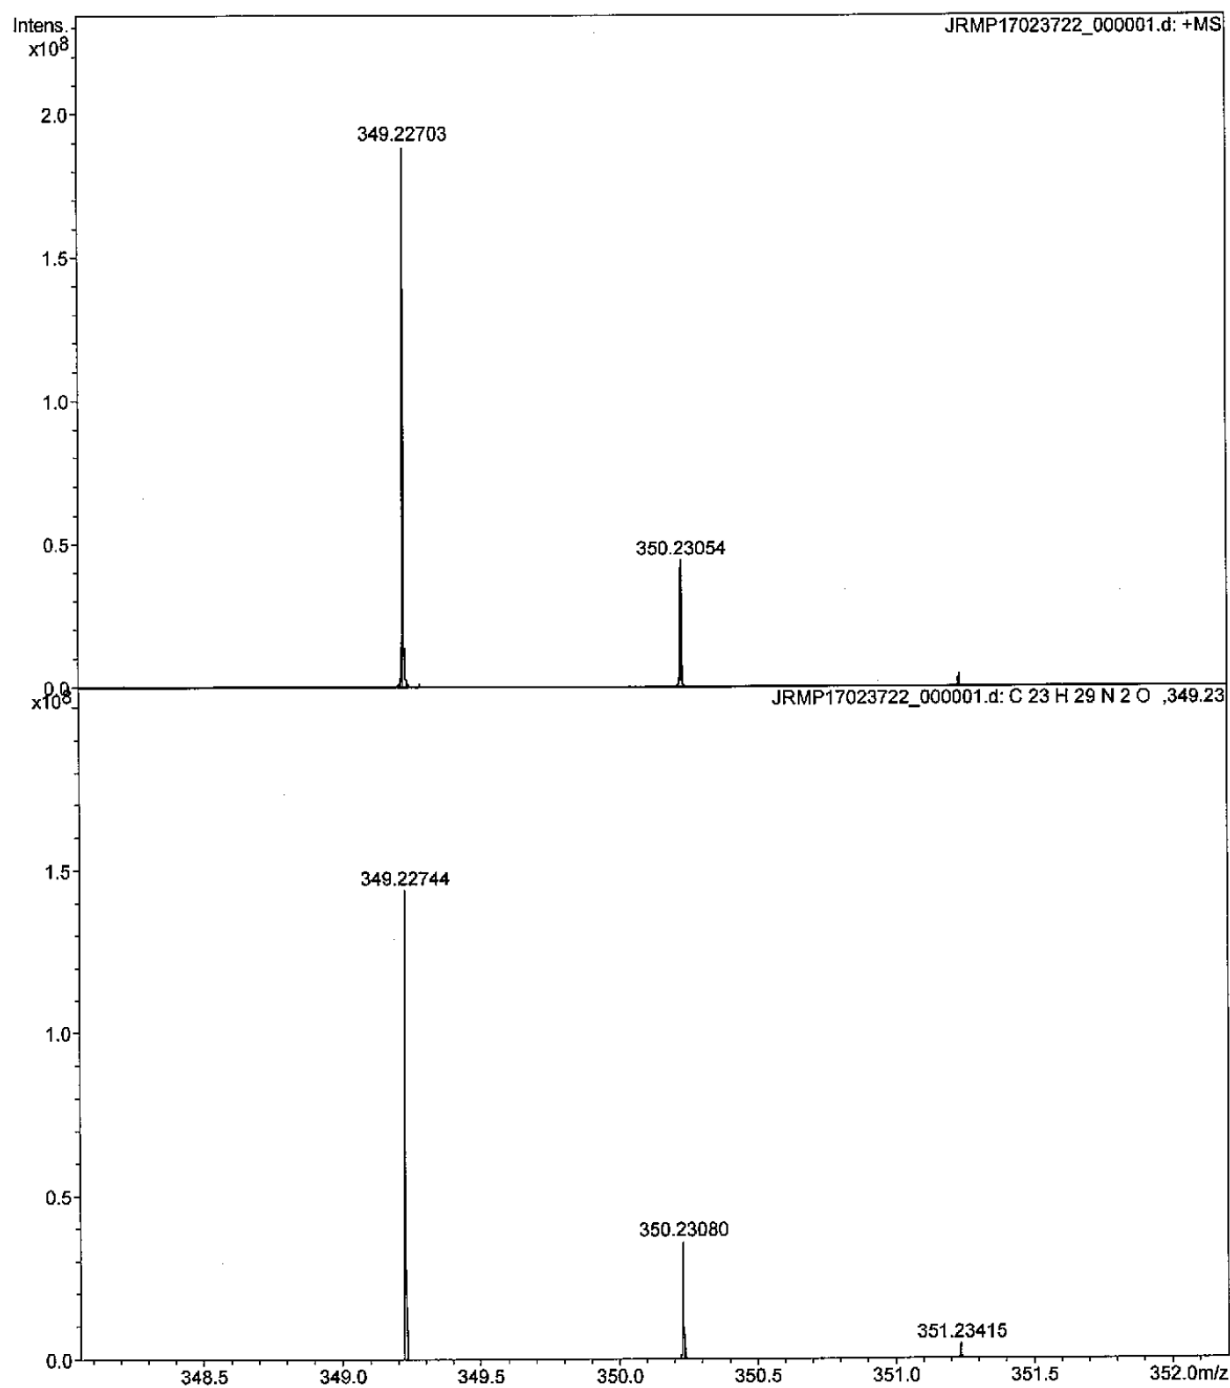

**Figure S34:** HRMS of compound *1-(3-Methylbut-2-en-1-yl)-3-(piperidin-1-ylmethyl)-9H-carbazol-2-ol* (**1b**), (20, 300 V).

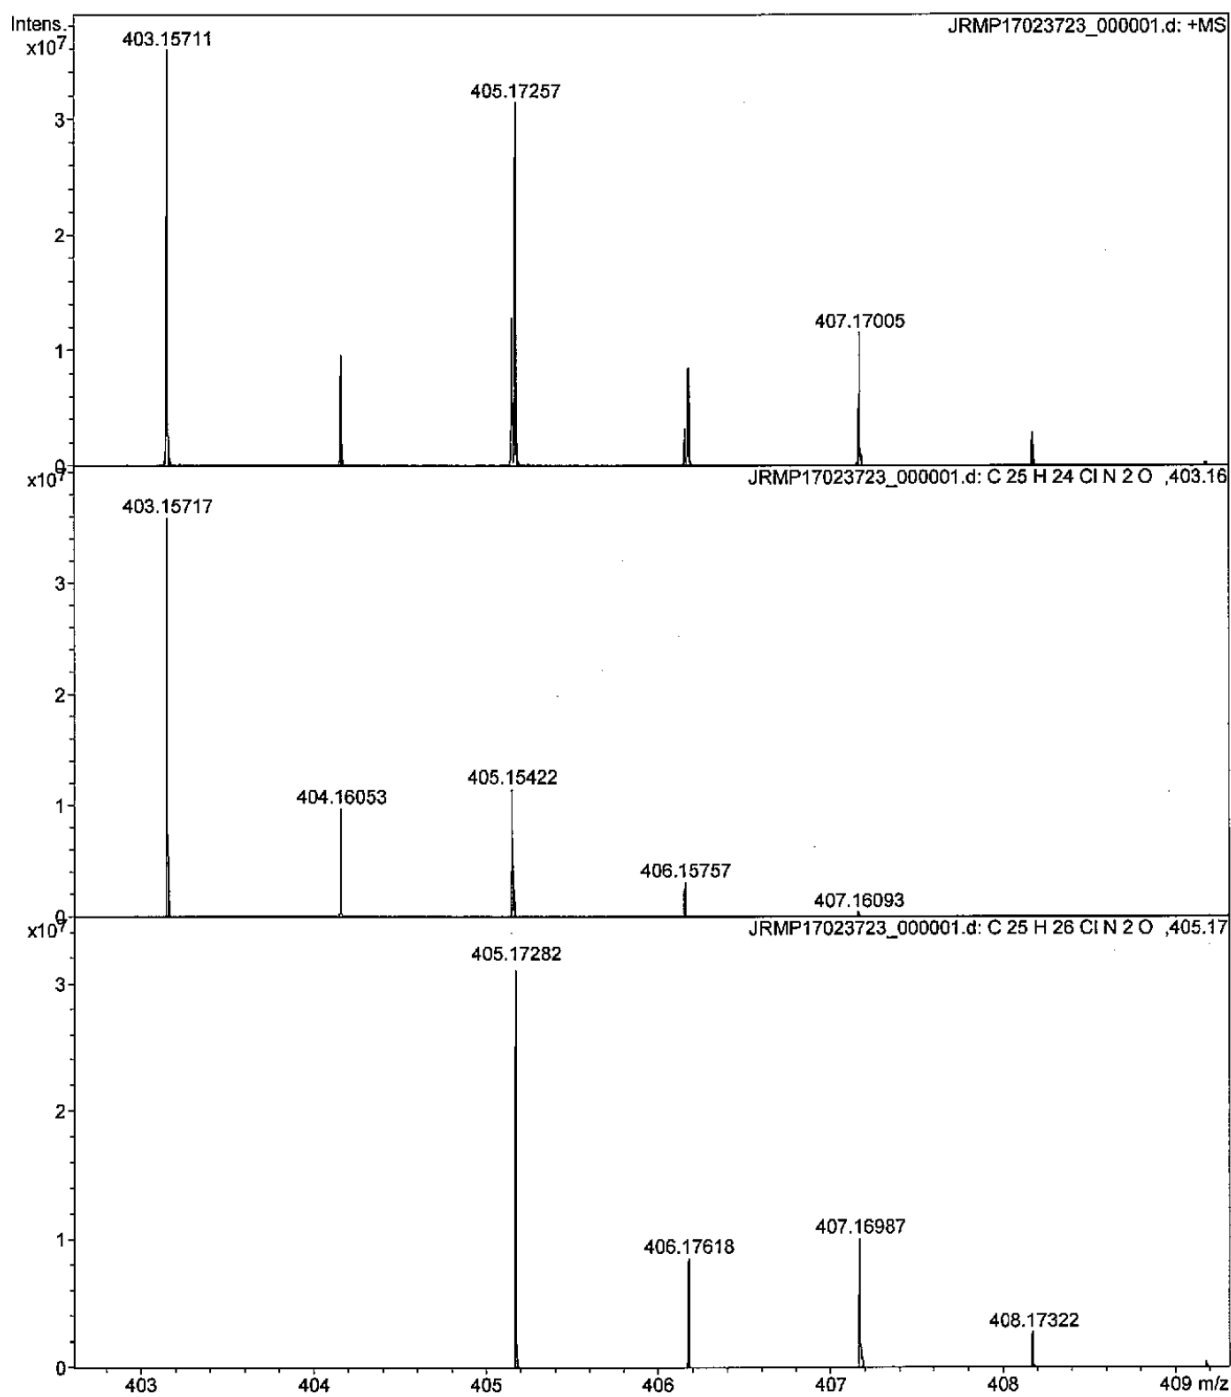

**Figure S35:** HRMS of compound of compound 3-[[*(4-Chlorobenzyl)amino*]methyl]-1-(3-methylbut-2-en-1-yl)-9*H*-carbazol-2-ol (**1c**), (20, 300 V).

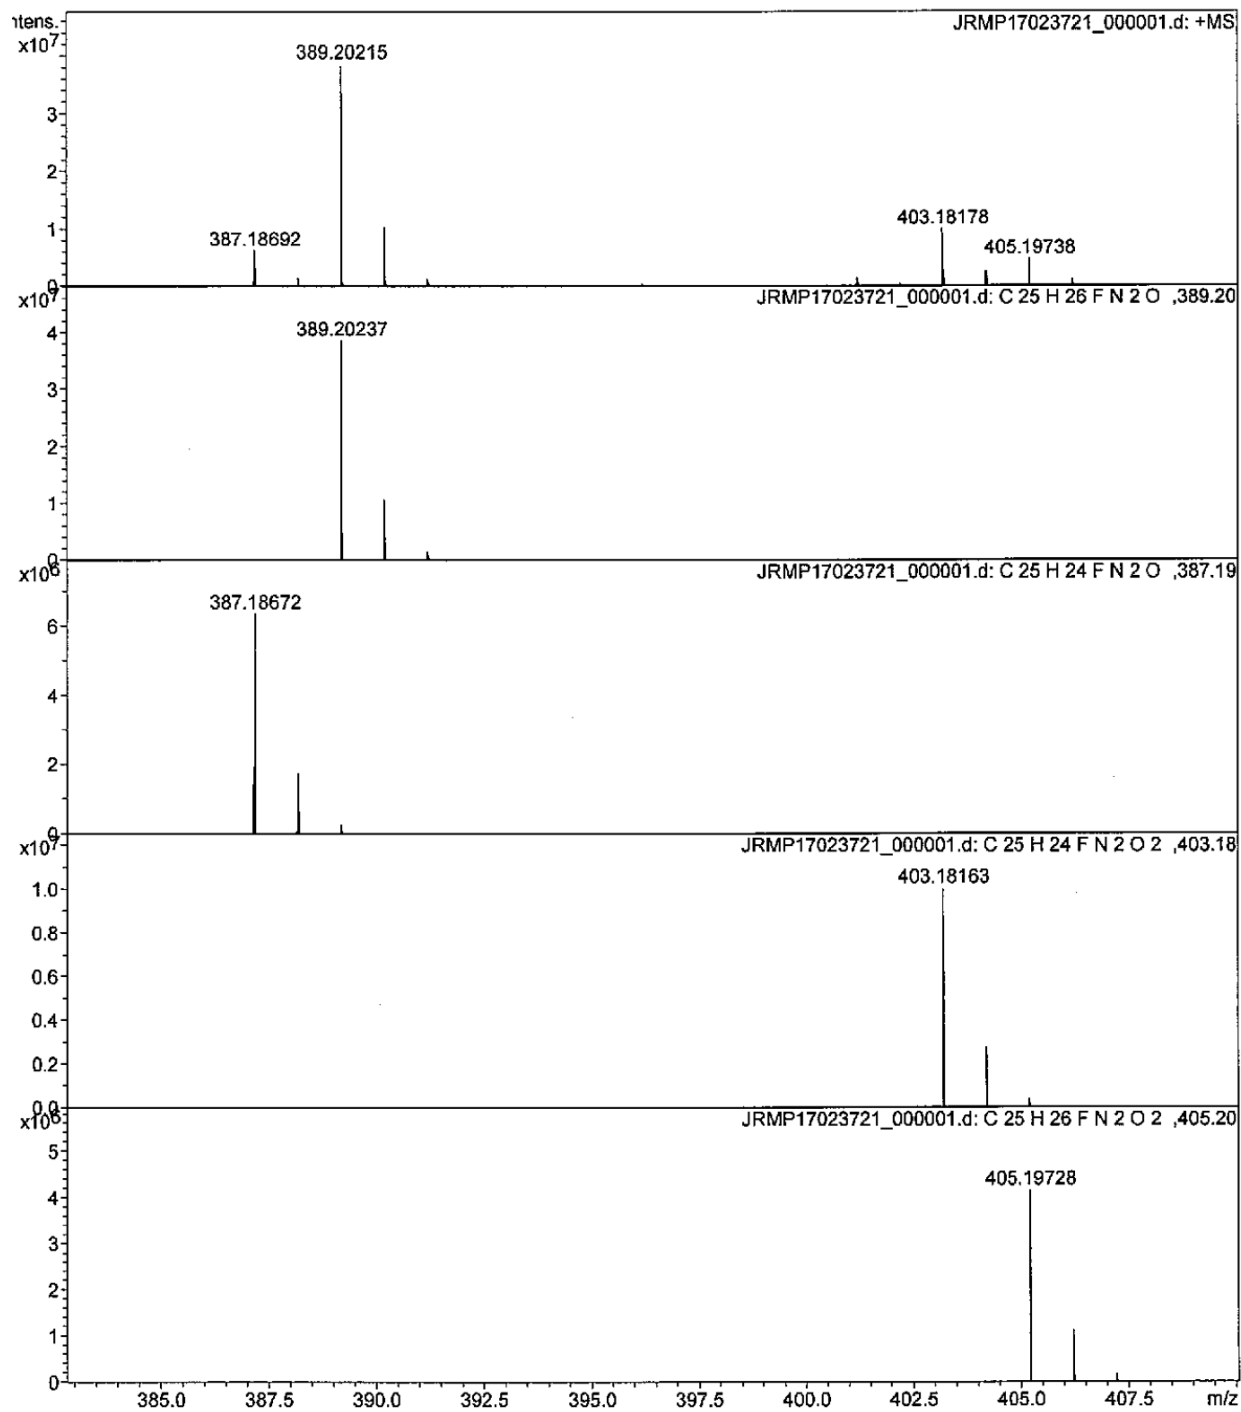

**Figure S36:** HRMS of compound 3- $\{[(4\text{-Fluorobenzyl})\text{amino}]\text{methyl}\}$ -1-(3-methylbut-2-en-1-yl)-9H-carbazol-2-ol (**1d**) (20, 300 V).

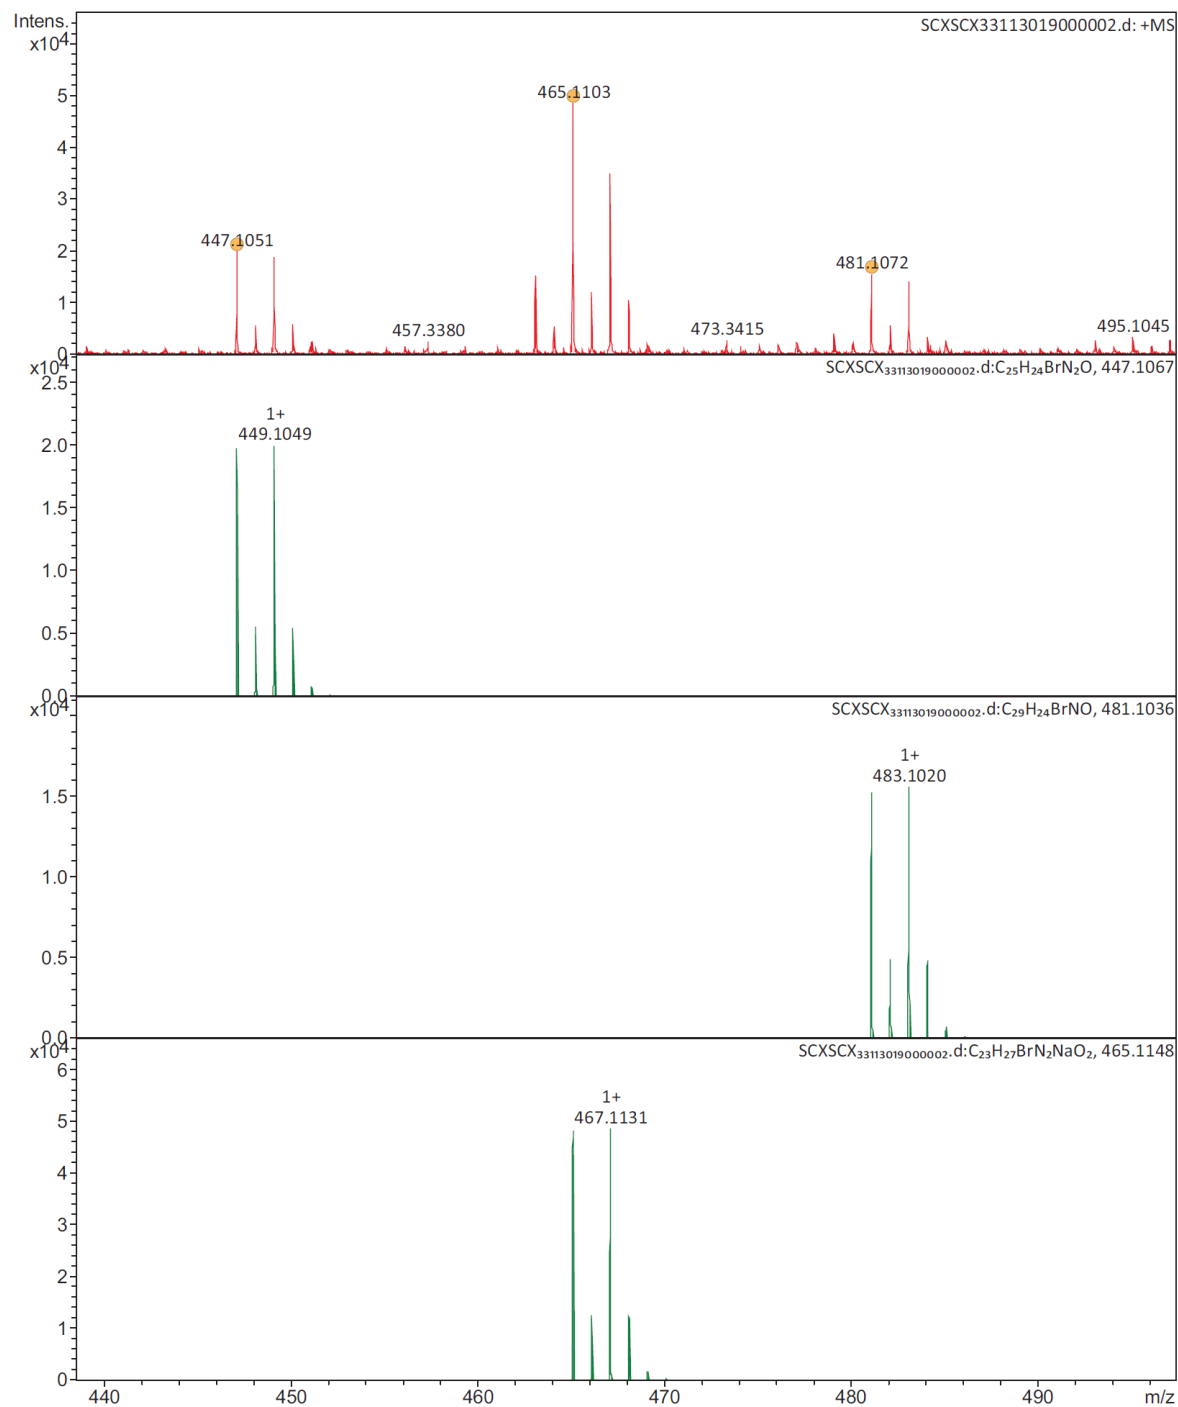

**Figure S37:** HRMS of compound 3- $\{[(4\text{-Bromobenzyl})\text{amino}]\text{methyl}\}$ -1-(3-methylbut-2-en-1-yl)-9H-carbazol-2-ol (**1e**). (20, 300 V).

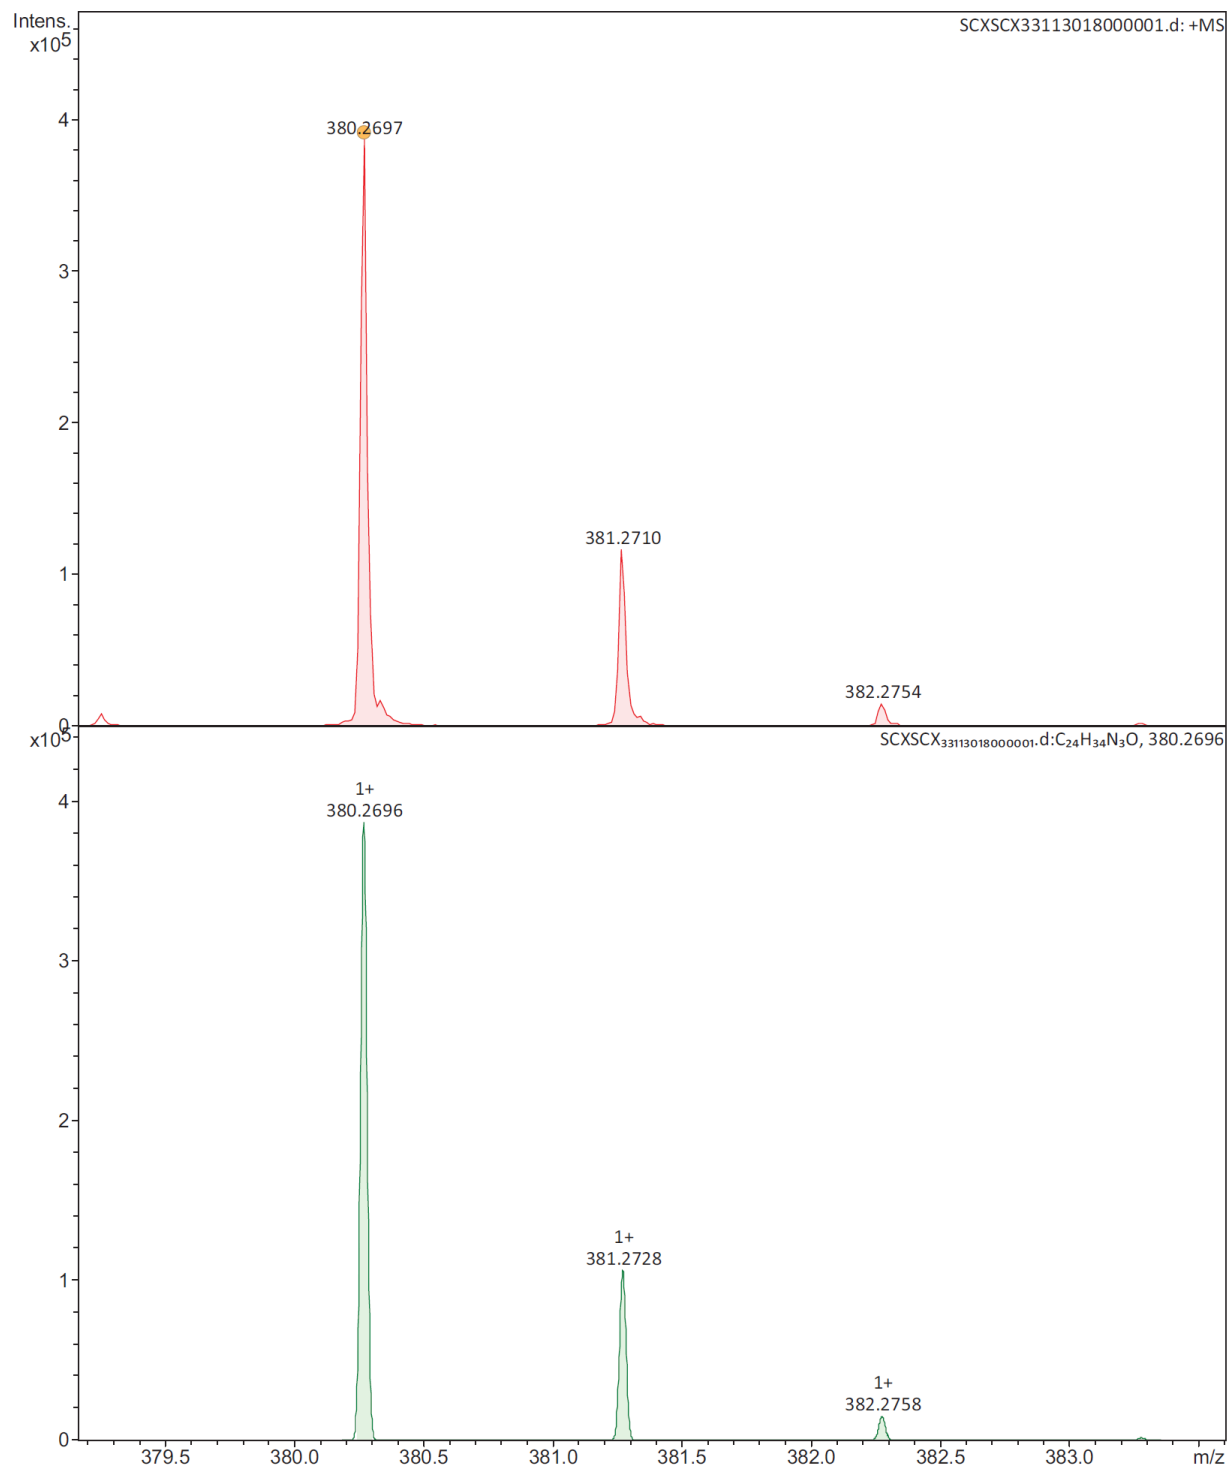

**Figure S38:** HRMS of compound 3- $\{[(3-(\text{Dimethylamino})\text{propyl})(\text{methyl})\text{amino}]\text{methyl}\}$ -7-methoxy-1-(3-methylbut-2-en-1-yl)-9H-carbazol-2-ol (**2a**), (20, 300 V).

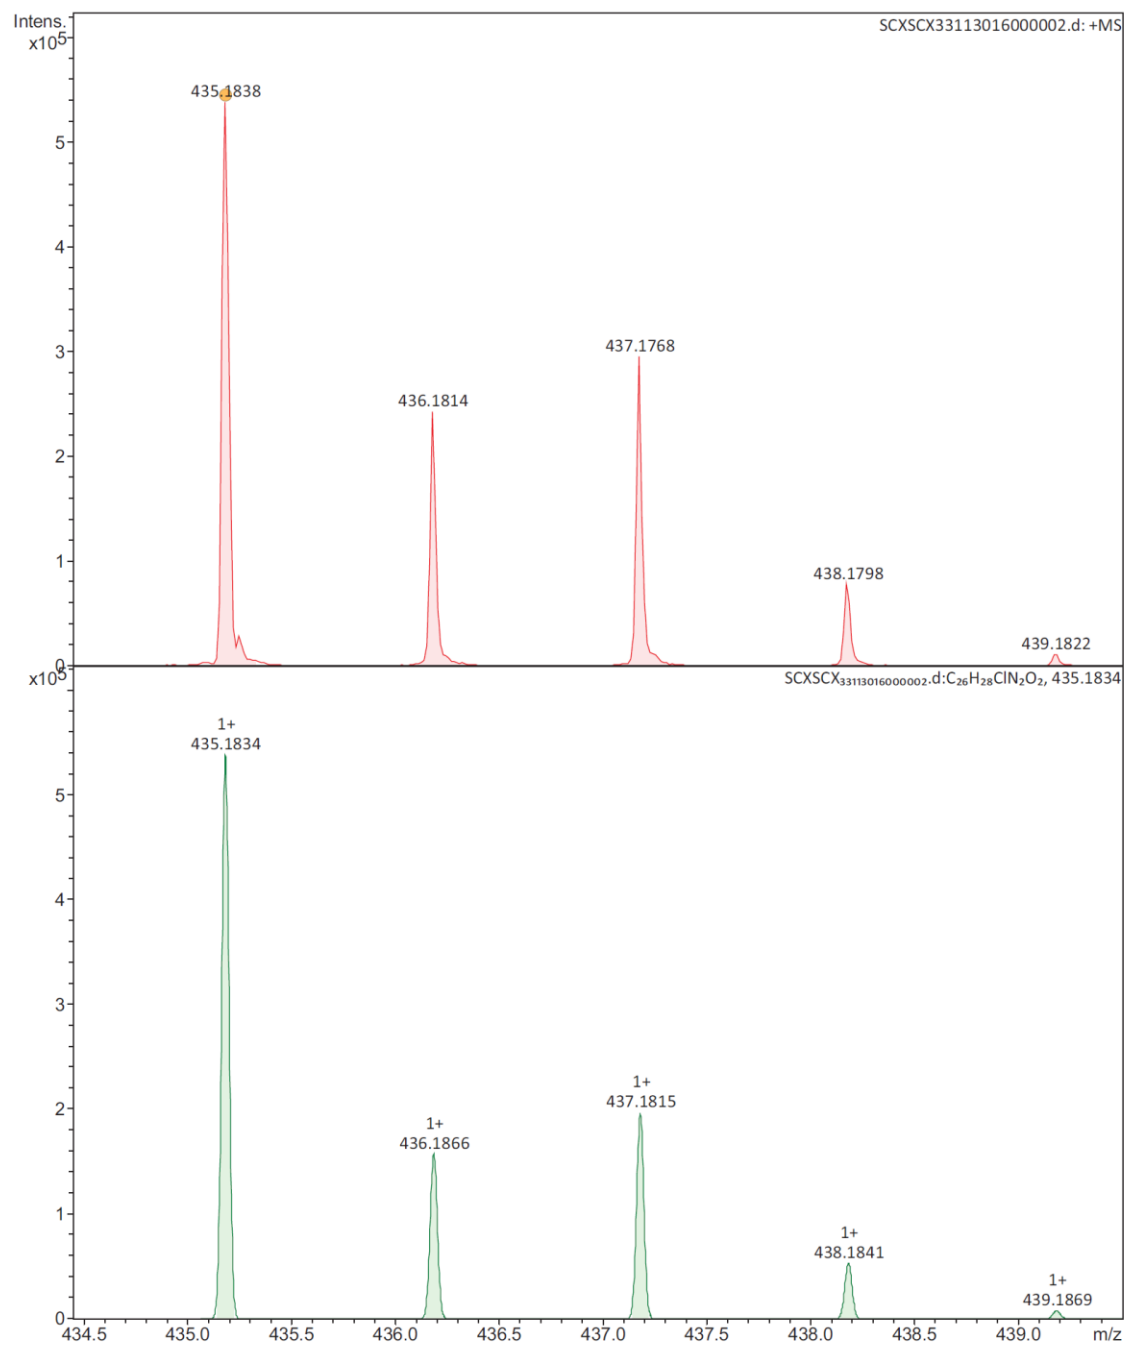

**Figure S39:** HRMS of compound 3- $\{[(4\text{-Chlorobenzyl})\text{amino}]\text{methyl}\}$ -7-methoxy-1-(3-methylbut-2-en-1-yl)-9H-carbazol-2-ol (**2c**), (20, 300 V).



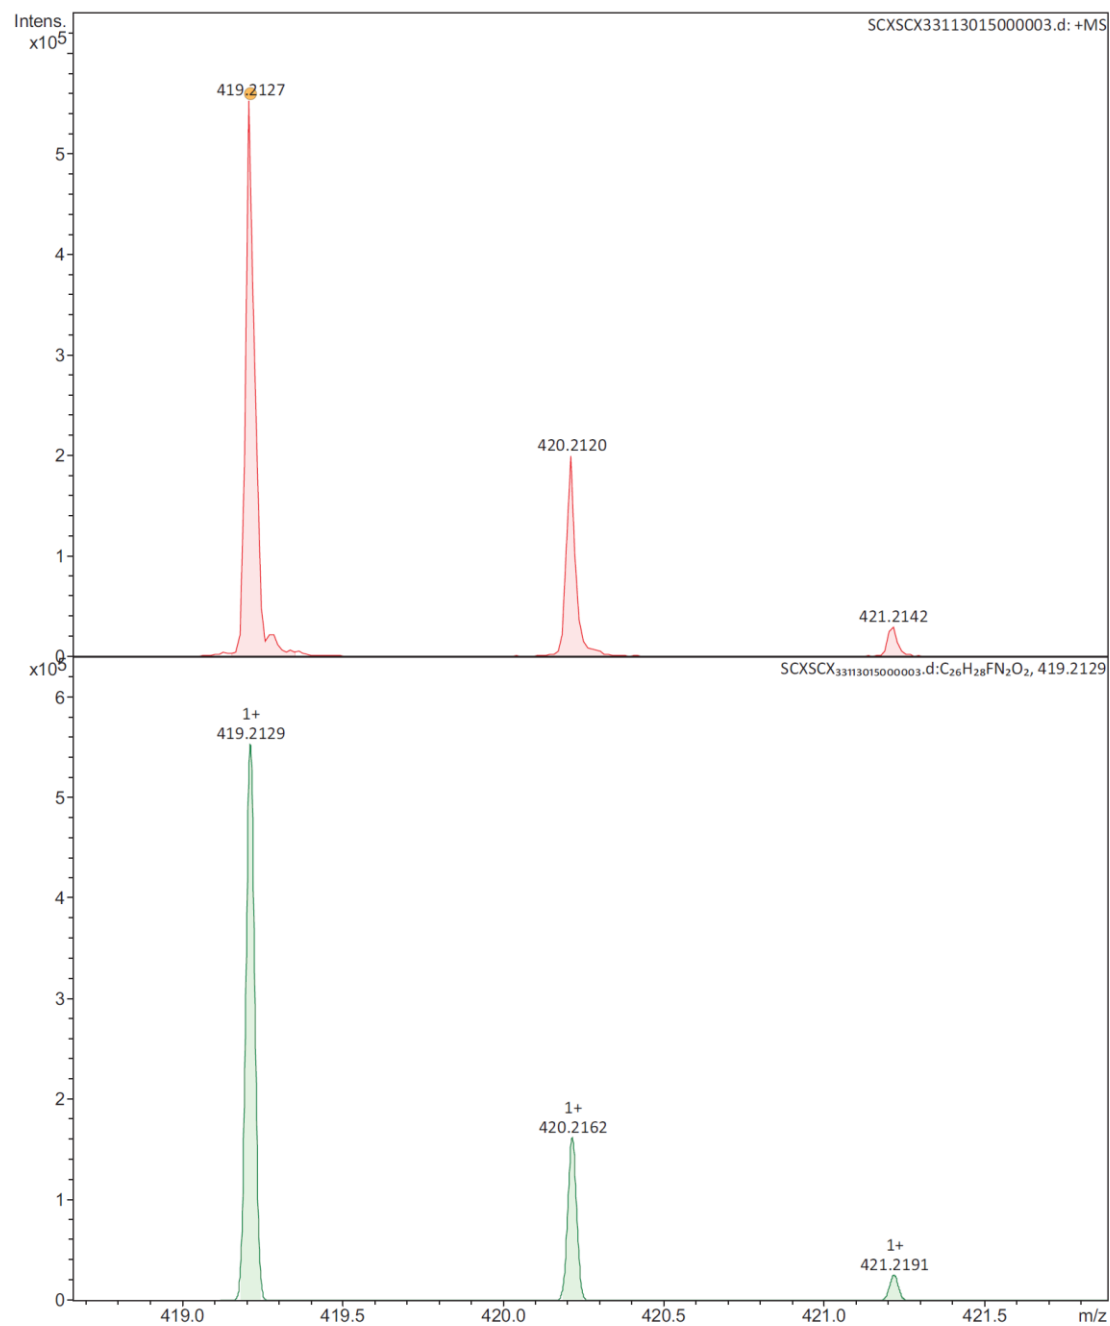

**Figure S40:** HRMS of compound 3- $\{[(4\text{-Fluorobenzyl})\text{amino}]\text{methyl}\}$ -7-methoxy-1-(3-methylbut-2-en-1-yl)-9H-carbazol-2-ol (**2d**), (20, 300 V).

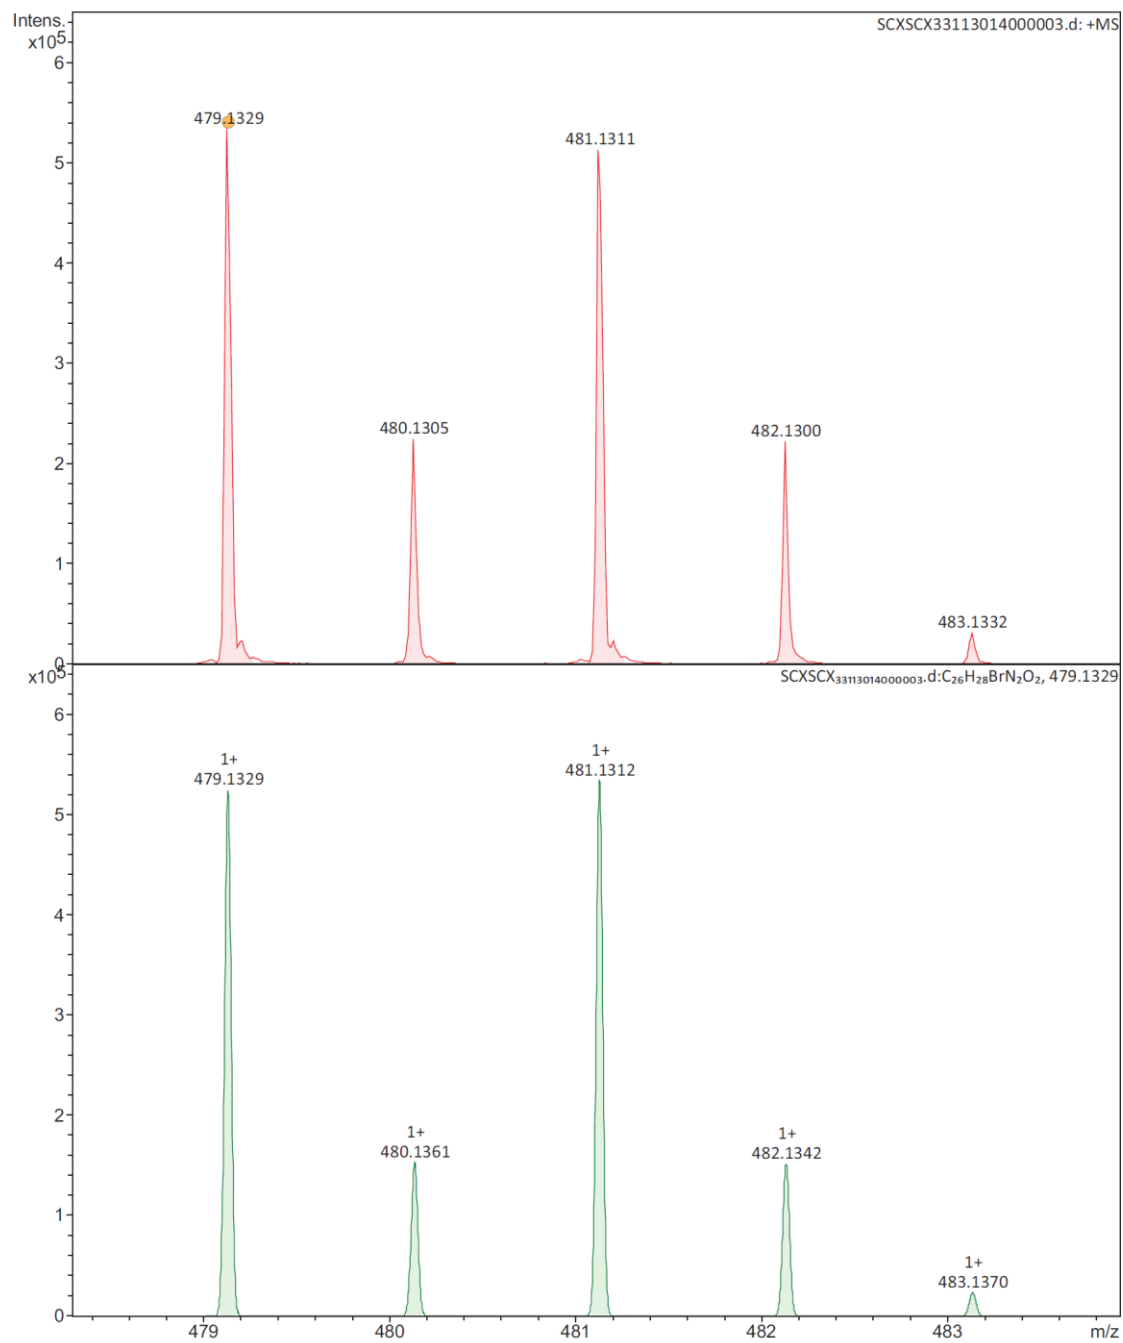

**Figure S41:** HRMS of compound 3- $\{[(4\text{-Bromobenzyl})\text{amino}]\text{methyl}\}$ -7-methoxy-1-(3-methylbut-2-en-1-yl)-9H-carbazol-2-ol (**2e**), (20, 300 V).

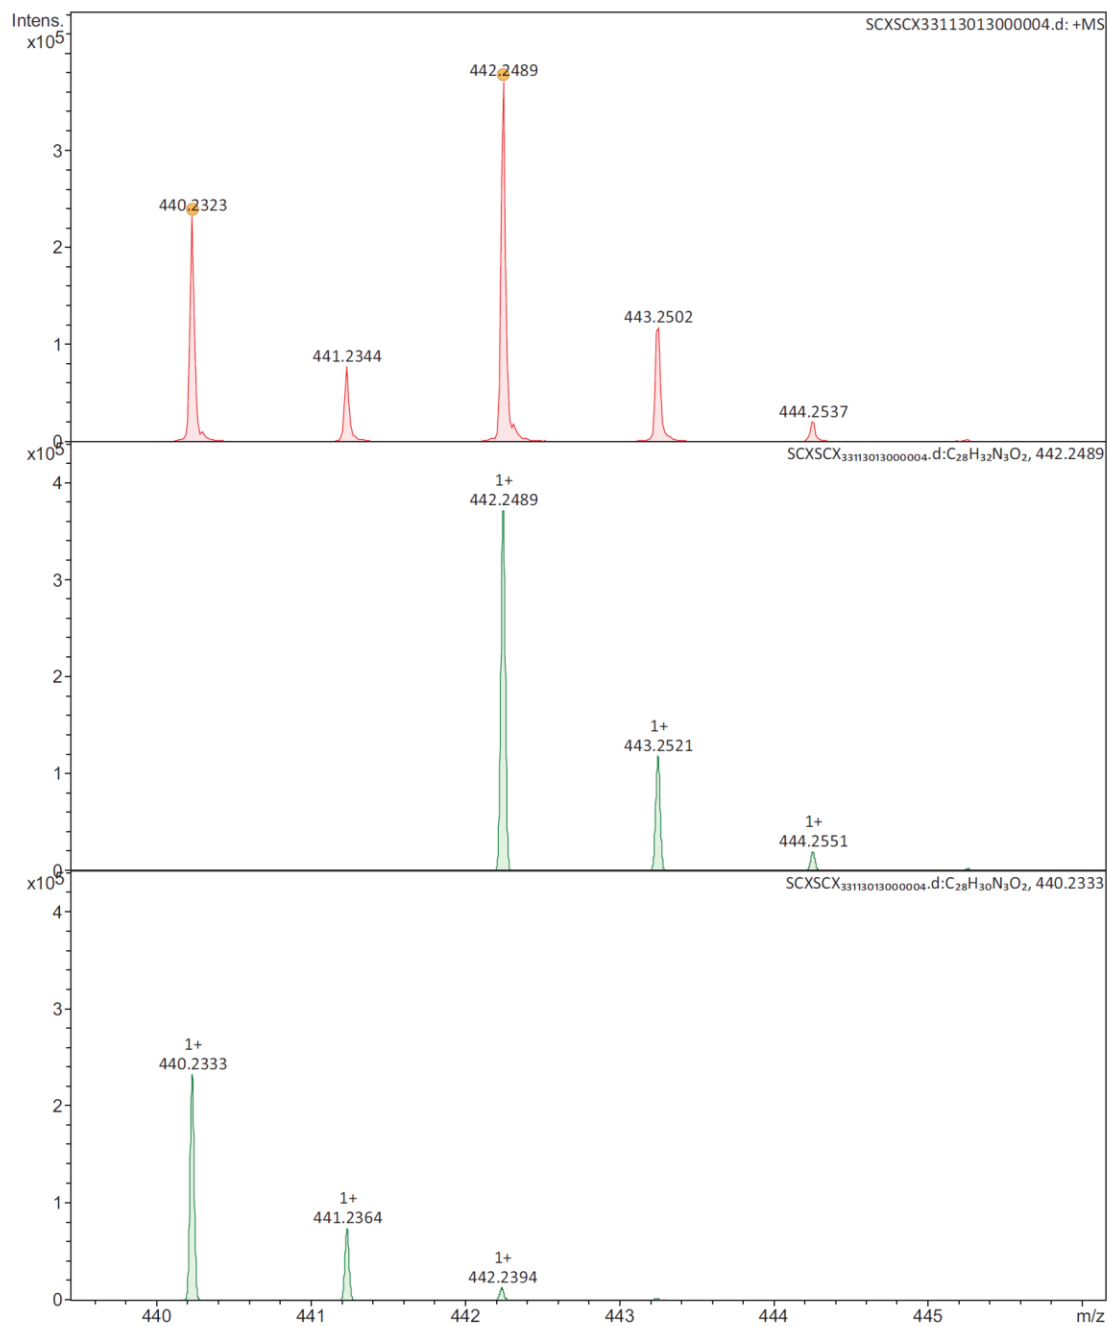

**Figure S42:** HRMS of compound 3-[(5-Amino-3,4-dihydroisoquinolin-2(1H)-yl)methyl]-7-methoxy-1-(3-methylbut-2-en-1-yl)-9H-carbazol-2-ol (**2f**), (20, 300 V)

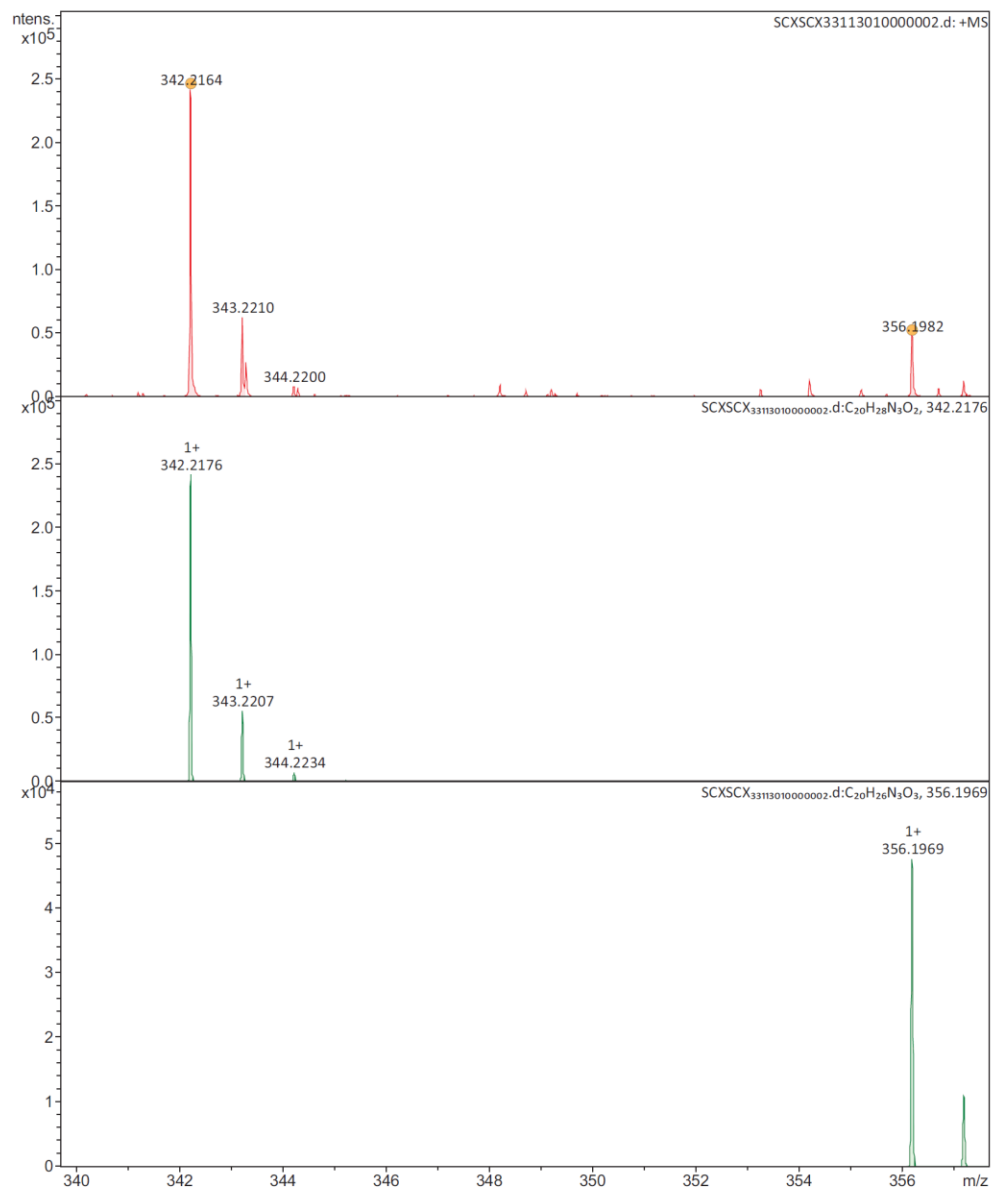

**Figure S43:** HRMS of compound 3- $\{[(3-(\text{Dimethylamino})\text{propyl})(\text{methyl})\text{amino}]\text{methyl}\}$ -7-methoxy-9H-carbazol-2-ol (**3a**), (20, 300 V).
